# Supplementary material
Source: publisher figshare collection journal article supplement (https://frontiersin.figshare.com/ndownloader/files/13848404)
Supplement: Supplementary file [file 13848404]

## *Supplementary Material*

# **Predicting Gleason Score of Prostate Cancer Patients using Radiomic Analysis**

**Ahmad Chaddad<sup>1,2\*</sup>, Tamim Niazi<sup>1\*</sup>, Stephan Probst<sup>3</sup>, Franck Bladou<sup>4</sup>, Maurice Anidjar<sup>4</sup>, Boris Bahoric<sup>1</sup>**

<sup>1</sup>Division of Radiation Oncology, McGill University, Montreal, Quebec, Canada

<sup>2</sup>Department of automated production engineering, ETS, Montreal, Canada

<sup>3</sup>Division of Nuclear Medicine, McGill University, Montreal, Canada

<sup>4</sup>Department of Urology, McGill University, Montreal, Canada

**\* Correspondence authors:**

**Ahmad Chaddad & Tamim Niazi**

Department of radiation oncology,

McGill University Health Center,

1001 Boulevard Décarie,

Montréal, Québec, H4A 3J1, Canada

Tel : +1-514-619-0751

Email: [ahmad.chaddad@mail.mcgill.ca](mailto:ahmad.chaddad@mail.mcgill.ca) or [tniazi@jgh.mcgill.ca](mailto:tniazi@jgh.mcgill.ca)

# 1 Supplementary Tables

**Supplementary Table 1: PCa patients (n=99 cases)**

|                |                |                |                |                |                |                |                |                |                |
|----------------|----------------|----------------|----------------|----------------|----------------|----------------|----------------|----------------|----------------|
| ProstateX-0000 | ProstateX-0026 | ProstateX-0055 | ProstateX-0094 | ProstateX-0110 | ProstateX-0123 | ProstateX-0139 | ProstateX-0164 | ProstateX-0183 | ProstateX-0195 |
| ProstateX-0001 | ProstateX-0028 | ProstateX-0067 | ProstateX-0095 | ProstateX-0111 | ProstateX-0124 | ProstateX-0141 | ProstateX-0165 | ProstateX-0184 | ProstateX-0196 |
| ProstateX-0002 | ProstateX-0031 | ProstateX-0069 | ProstateX-0097 | ProstateX-0114 | ProstateX-0125 | ProstateX-0142 | ProstateX-0168 | ProstateX-0186 | ProstateX-0197 |
| ProstateX-0004 | ProstateX-0035 | ProstateX-0071 | ProstateX-0099 | ProstateX-0115 | ProstateX-0126 | ProstateX-0143 | ProstateX-0169 | ProstateX-0187 | ProstateX-0198 |
| ProstateX-0005 | ProstateX-0037 | ProstateX-0076 | ProstateX-0101 | ProstateX-0116 | ProstateX-0127 | ProstateX-0145 | ProstateX-0172 | ProstateX-0188 | ProstateX-0199 |
| ProstateX-0014 | ProstateX-0040 | ProstateX-0077 | ProstateX-0102 | ProstateX-0117 | ProstateX-0128 | ProstateX-0148 | ProstateX-0173 | ProstateX-0190 | ProstateX-0200 |
| ProstateX-0015 | ProstateX-0041 | ProstateX-0078 | ProstateX-0103 | ProstateX-0118 | ProstateX-0129 | ProstateX-0150 | ProstateX-0174 | ProstateX-0191 | ProstateX-0201 |
| ProstateX-0016 | ProstateX-0046 | ProstateX-0082 | ProstateX-0104 | ProstateX-0119 | ProstateX-0131 | ProstateX-0152 | ProstateX-0179 | ProstateX-0192 | ProstateX-0202 |
| ProstateX-0018 | ProstateX-0053 | ProstateX-0084 | ProstateX-0105 | ProstateX-0121 | ProstateX-0133 | ProstateX-0153 | ProstateX-0181 | ProstateX-0193 | ProstateX-0203 |
| ProstateX-0019 | ProstateX-0054 | ProstateX-0092 | ProstateX-0106 | ProstateX-0122 | ProstateX-0136 | ProstateX-0162 | ProstateX-0182 | ProstateX-0194 |                |

**Supplementary Table 2: Patients characteristics and Gleason score**

| <b>Gleason (n)</b> | <b>Gleason score</b> |                             | <b>PCa zone</b>    | <b>This study</b> |
|--------------------|----------------------|-----------------------------|--------------------|-------------------|
| Grade Group 1 (30) | $\leq 6$             |                             | PZ=10; AS=14; TZ=6 | G1 (30)           |
| Grade Group 2 (39) | $3+4 = 7$            |                             | PZ=19; AS=15; TZ=5 | G2 (39)           |
| Grade Group 3 (17) | $\geq 7$             | $4+3=7$ or                  | PZ=6; AS=8; TZ=3   | G3 (30)           |
| Grade Group 4 (7)  |                      | $4+4=8$ ; $3+5=8$ ; $5+3=8$ | PZ=3; AS=3; TZ=1   |                   |
| Grade Group 5 (6)  |                      | 9 or 10                     | PZ=2; AS=4; TZ=0   |                   |

Supplementary Table 3: Description of features computed within the sub-volume of PCa tumor

| Features                                                                                                                                                                        | Description                                                                                                                                                             |
|---------------------------------------------------------------------------------------------------------------------------------------------------------------------------------|-------------------------------------------------------------------------------------------------------------------------------------------------------------------------|
| <b>Histogram (first order features): These features are derived from the first order statistics and provide information related to the gray-level distribution of the ROIs</b>  |                                                                                                                                                                         |
| <b>Average (Mean)</b>                                                                                                                                                           | The average gray level intensity                                                                                                                                        |
| <b>Variance</b>                                                                                                                                                                 | Measures the spread distribution about the average                                                                                                                      |
| <b>Skewness</b>                                                                                                                                                                 | Measures the asymmetry of the distribution of values about the average value                                                                                            |
| <b>Kurtosis</b>                                                                                                                                                                 | Measures the peakedness of the distribution of values in the image                                                                                                      |
| <b>Energy</b>                                                                                                                                                                   | Measures the magnitude of voxel values                                                                                                                                  |
| <b>Entropy</b>                                                                                                                                                                  | Describes the randomness in the image values                                                                                                                            |
| <b>Grey-level co-occurrence matrix (GLCM): These texture features use second order statistics to characterize the spatial relationship between intensity values within ROIs</b> |                                                                                                                                                                         |
| <b>Angular second moment</b>                                                                                                                                                    | Measures the textural uniformity that is pixel pair repetitions. It detects disorders in textures                                                                       |
| <b>Contrast</b>                                                                                                                                                                 | Measures the local intensity variation                                                                                                                                  |
| <b>Correlation</b>                                                                                                                                                              | Describes the linear dependency of gray level values to their respective voxels in the GLCM                                                                             |
| <b>Sum of squares variance</b>                                                                                                                                                  | Measures the distribution of neighboring intensity level pairs about the average of intensity level in the GLCM                                                         |
| <b>Homogeneity</b>                                                                                                                                                              | Measures the closeness of the distribution of elements in the GLCM to the GLCM diagonal                                                                                 |
| <b>Sum-average</b>                                                                                                                                                              | Measures the relationship between occurrences of pairs with lower intensity values and occurrences of pairs with higher intensity values                                |
| <b>Sum-variance</b>                                                                                                                                                             | Describes the weights elements that differ from the average value of the GLCM.                                                                                          |
| <b>Sum-entropy</b>                                                                                                                                                              | Represents the sum of neighborhood intensity value differences.                                                                                                         |
| <b>Entropy</b>                                                                                                                                                                  | Describes the randomness in the GLCM                                                                                                                                    |
| <b>Difference variance</b>                                                                                                                                                      | Measure of heterogeneity that places higher weights on differing intensity level pairs that deviate more from the mean.                                                 |
| <b>Difference entropy</b>                                                                                                                                                       | Measure of the randomness/variability in neighborhood intensity value differences.                                                                                      |
| <b>Information measure of correlation 1</b>                                                                                                                                     | Measures the differences of randomness (entropy)                                                                                                                        |
| <b>Information measure of correlation 2</b>                                                                                                                                     | Measure the differences of randomness using exponential formula                                                                                                         |
| <b>Autocorrelation</b>                                                                                                                                                          | measure of the magnitude of the fineness and coarseness of texture                                                                                                      |
| <b>Dissimilarity</b>                                                                                                                                                            | Describes the contrast of local region                                                                                                                                  |
| <b>Cluster shade</b>                                                                                                                                                            | Measure of the skewness and uniformity of the GLCM                                                                                                                      |
| <b>Cluster prominence</b>                                                                                                                                                       | Measure of the skewness and asymmetry of the GLCM                                                                                                                       |
| <b>Maximum probability</b>                                                                                                                                                      | Represents the occurrences of the most predominant pair of neighboring intensity values.                                                                                |
| <b>Inverse difference</b>                                                                                                                                                       | Measures of the local homogeneity of an image                                                                                                                           |
| <b>Neighborhood grey-tone difference matrix (NGTDM): These features use higher-order statistics to measure intensity differences between neighbor voxels</b>                    |                                                                                                                                                                         |
| <b>Coarseness</b>                                                                                                                                                               | Describes the texture uniformity                                                                                                                                        |
| <b>Contrast</b>                                                                                                                                                                 | Describes the spatial intensity change and the overall gray level dynamic range.                                                                                        |
| <b>Busyness</b>                                                                                                                                                                 | Measures the change from a pixel/voxel to its neighbour.                                                                                                                |
| <b>Complexity</b>                                                                                                                                                               | An image is considered complex when it has several rapid changes in gray level intensity.                                                                               |
| <b>Texture Strength</b>                                                                                                                                                         | An image is considered strength when it has a slow change in intensity but more large coarse differences in gray level intensities.                                     |
| <b>Grey-level zone size matrix (GLSZM/ GLZM): These texture features characterize the size of uniform voxel regions, called zones.</b>                                          |                                                                                                                                                                         |
| <b>Small zone size emphasis</b>                                                                                                                                                 | Describes the fine textures.                                                                                                                                            |
| <b>Large zone size emphasis</b>                                                                                                                                                 | Describes the coarse textures.                                                                                                                                          |
| <b>Low gray-level zone emphasis</b>                                                                                                                                             | Measures the distribution of lower gray-level size zones, with a higher value indicating a greater proportion of lower gray-level values and size zones in the image    |
| <b>High gray-level zone emphasis</b>                                                                                                                                            | Measures the distribution of the higher gray-level values, with a higher value indicating a greater proportion of higher gray-level values and size zones in the image. |
| <b>Small zone / low gray emphasis</b>                                                                                                                                           | Describes the joint distribution of smaller size zones with lower gray-level values.                                                                                    |
| <b>Small zone / high gray emphasis</b>                                                                                                                                          | Describes the joint distribution of smaller size zones with higher gray-level values.                                                                                   |
| <b>Large zone / low gray emphasis</b>                                                                                                                                           | Describes the joint distribution of larger size zones with lower gray-level values.                                                                                     |
| <b>Large zone / high gray emphasis</b>                                                                                                                                          | Describes the joint distribution of larger size zones with higher gray-level values.                                                                                    |
| <b>Gray level non-uniformity</b>                                                                                                                                                | Measures the variability of gray-level intensity values in the image, with a lower value indicating more homogeneity in intensity values.                               |
| <b>Zone Size Non-Uniformity</b>                                                                                                                                                 | Measures the variability of size zone volumes in the image, with a lower value indicating more homogeneity in size zone volumes.                                        |
| <b>Zone Size Percentage</b>                                                                                                                                                     | Measures the coarseness of the texture by taking the ratio of number of zones and number of voxels in the ROI                                                           |

**Supplementary Table 4: Performance metrics (%) for predicting the groups of Gleason score**

| <b>Metrics</b>             | <b>G1 vs. all</b> | <b>G2 vs. all</b> | <b>G3 vs. all</b> |
|----------------------------|-------------------|-------------------|-------------------|
| <b>Classifier accuracy</b> | 81.82             | 66.67             | 74.75             |
| <b>NPV</b>                 | 75.00             | 57.89             | 80.56             |
| <b>PPV</b>                 | 84.00             | 72.13             | 59.26             |
| <b>AUC</b>                 | 83.40             | 72.71             | 77.35             |

**Supplementary Table 5: The confusion matrix for a binary classification**

|              | <b>G1<br/>(n=30)</b> | <b>G2-G3<br/>(n=69)</b> |              | <b>G2<br/>(n=39)</b> | <b>G1-G3<br/>(n=60)</b> |              | <b>G3<br/>(n=30)</b> | <b>G1-G2<br/>(n=69)</b> |
|--------------|----------------------|-------------------------|--------------|----------------------|-------------------------|--------------|----------------------|-------------------------|
| <b>G1</b>    | 18                   | 12                      | <b>G2</b>    | 22                   | 17                      | <b>G3</b>    | 16                   | 14                      |
| <b>G2-G3</b> | 6                    | 63                      | <b>G1-G3</b> | 16                   | 44                      | <b>G1-G2</b> | 11                   | 58                      |

## 2 Supplementary Figures

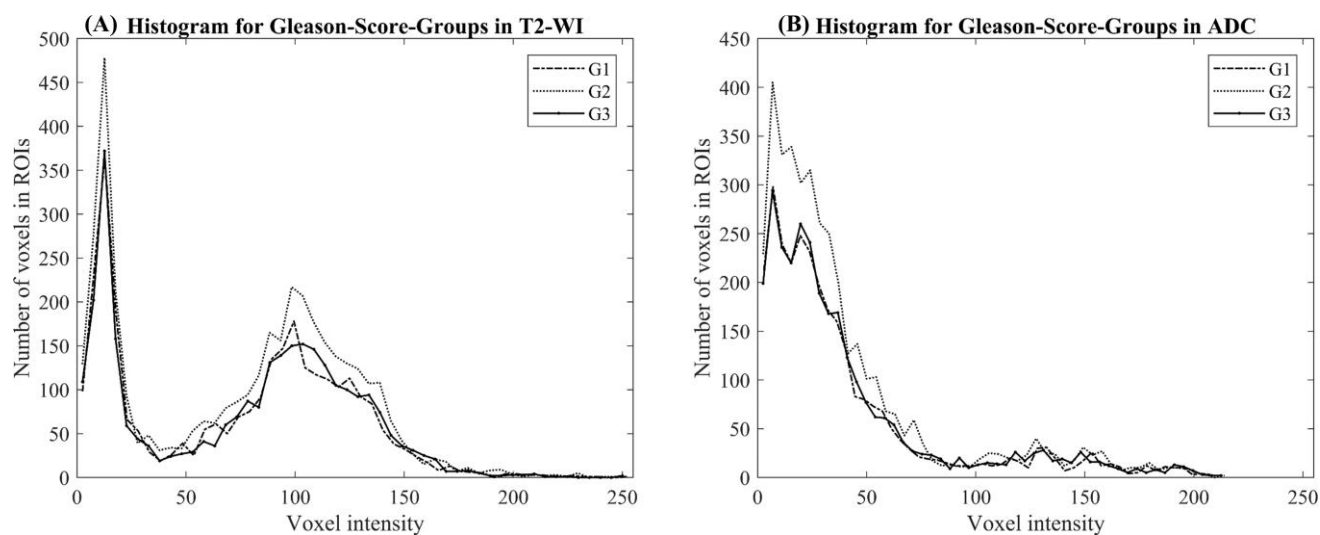

**Supplementary Figure 1.** Histogram of ROIs derived from the Gleason Score Groups (i.e. G1, G2 and G3) of PCa patients. (A) T2-WI and (B) ADC.

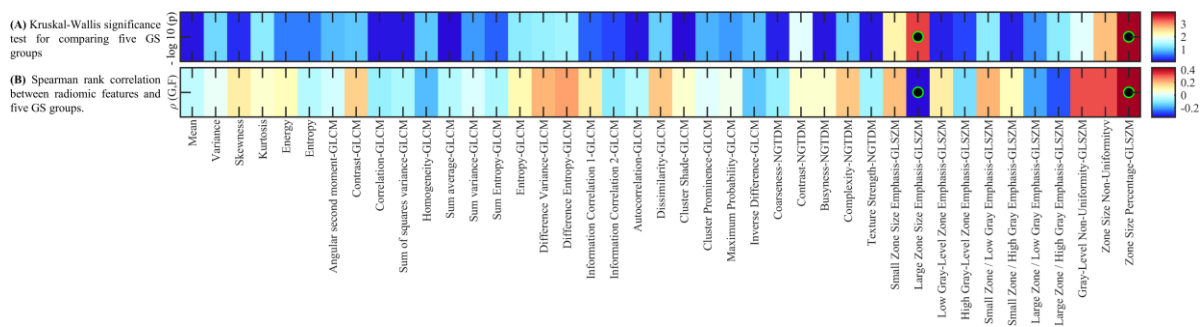

**Supplementary Figure 2.** (A) Heatmap of the Kruskal-Wallis significance test p values ( $-\log_{10}$  scale) using radiomic features to identify patients of five groups of Gleason scores. (B) Spearman rank correlation between features value and five groups of Gleason score, color-coded from minimum (dark blue) to maximum (dark red). In (A) and (B), significant features are labeled with a black-green circle (corrected  $p < 0.05$ ).
